# Supplementary material for: Oxazolines as chiral building blocks for imidazolium salts and N-heterocyclic carbene ligandsElectronic supplementary information (ESI) available: spectroscopic data for 10 and 12. See http://www.rsc.org/suppdata/cc/b2/b208045a/
Source: Royal Society of Chemistry journal article supplement (doi:10.1039/b208045a), 2002-10-18
Supplement: b208045a.doc [file b208045a.doc]

Spectroscopic data:

Carbene **10**: 1H NMR (400 MHz, d8-THF)  4.75 (dd, *J* = 7.6, 8.8 Hz, 2H, CH2O), 4.53 (dd, *J* = 4.9, 8.8 Hz, 2H, CH2O), 4.15 (dt, *J* = 5.0, 7.6 Hz, 2H, CHN), 2.12-2.07 (m, 2H, C*H*CH3), 1.04 (d, *J* = 6.9 Hz, 6H, CH3), 0.98 (d, *J* = 6.9 Hz, 6H, CH3); 13C NMR (100 MHz, d8-THF)  195.8 (NCN), 125.0 (OCN), 79.2 (CH2), 62.7 (NCH), 33.3 (*C*HCH3), 18.7 (CH3), 18.2 (CH3).

Palladium complex **12**: R*f* = 0.77 (EtOAc/hexane 1:1); []20D = 260.1 (c 1.1, CH2Cl2); IR (KBr) 2962, 1752, 1425, 1391, 1202, 931, 827; 1H NMR (400 MHz, CDCl3)  4.83-4.78 (m, 8H, CHN, CH2O), 4.72-4.67 (m, 4H, CH2O), 3.13 (m, 4H, C*H*CH3), 1.03 (d, *J* = 7.1 Hz, 12H, CH3), 0.94 (d, *J* = 6.8 Hz, 12H, CH3); 13C NMR (100 MHz, CDCl3)  141.8 (NCPd), 126.2 (NCO), 75.6 (CH2O), 61.8 (CHN), 30.4 (CH), 18.9 (CH3), 14.8 (CH3); MS (EI), *m*/*z* (%) 832 (37) [M+], 705 (51), 578 (13), 363 (28), 341 (9), 237 (100). HRMS (EI) calcd for C26H40I2N4O2Pd: 832.0173, found 832.0177.
